# Supplementary material for: Insights into the charge-transfer character of electronic transitions inRCp2Ti(C2Fc)2complexes using solvatochromism, resonance Raman spectroscopy, and TDDFT
Source: Royal Society of Chemistry journal article supplement (doi:10.1039/d0dt04282j), 2021-01-01
Supplement: d0dt04282j1.pdf [file d0dt04282j1.pdf]

**Electronic Supporting Information for**  
**Insights into the Charge-Transfer Character of Electronic**  
**Transitions in  $R\text{Cp}_2\text{Ti}(\text{C}_2\text{Fc})_2$  Complexes Using Solvatochromism,**  
**Resonance Raman Spectroscopy, and TDDFT**

Elizabeth S. Carlton,<sup>a</sup> Joshua J. Sutton,<sup>b</sup> Ariel G. Gale,<sup>a</sup> George C. Shields,<sup>a</sup> Keith C. Gordon,<sup>b</sup>  
and Paul S. Wagenknecht<sup>a,\*</sup>

<sup>a</sup> Department of Chemistry, Furman University, Greenville, SC, 29613 USA

<sup>b</sup> Department of Chemistry, University of Otago, P.O. Box 56, Dunedin, New Zealand

|                                                                                                                                                                | <b>page</b> |
|----------------------------------------------------------------------------------------------------------------------------------------------------------------|-------------|
| <b>Figure S1.</b> Overlay of UV-Vis with TDDFT data for various computational models                                                                           | S2          |
| <b>Figure S2.</b> Comparison of B3PW91/6-311+G(d) with B3LYP/6-31G(d)                                                                                          | S3          |
| <b>Figure S3.</b> Solvatochromic data for $\text{Cp}_2\text{Ti}(\text{C}_2\text{Fc})_2$                                                                        | S4          |
| <b>Figure S4.</b> Solvatochromic data and goodness of fit plot for $\text{Cp}^*\text{Ti}(\text{C}_2\text{Fc})_2$                                               | S4          |
| <b>Figure S5.</b> Solvatochromic data and goodness of fit plot for $\text{Me}^{\text{OOC}}\text{Cp}_2\text{Ti}(\text{C}_2\text{Fc})_2$                         | S4          |
| <b>Table S1.</b> TDDFT output for key excited states for $\text{Cp}_2\text{Ti}(\text{C}_2\text{Fc})_2$                                                         | S5          |
| <b>Table S2.</b> Orbitals involved in key excited states for $\text{Cp}_2\text{Ti}(\text{C}_2\text{Fc})_2$                                                     | S6          |
| <b>Figure S6.</b> RRS, vibrational, and TDDFT data for $\text{Cp}^*\text{Ti}(\text{C}_2\text{Fc})_2$                                                           | S7          |
| <b>Table S3.</b> Key electronic transitions of $\text{Cp}^*\text{Ti}(\text{C}_2\text{Fc})_2$ with associated changes in electron density                       | S7          |
| <b>Figure S7.</b> RRS, vibrational, and TDDFT data for $\text{Me}^{\text{OOC}}\text{Cp}_2\text{Ti}(\text{C}_2\text{Fc})_2$                                     | S8          |
| <b>Table S4.</b> Key electronic transitions of $\text{Me}^{\text{OOC}}\text{Cp}_2\text{Ti}(\text{C}_2\text{Fc})_2$ with associated changes in electron density | S8          |
| <b>Table S5.</b> TDDFT output for key excited states for $\text{Cp}^*\text{Ti}(\text{C}_2\text{Fc})_2$                                                         | S9          |
| <b>Table S6.</b> Orbitals involved in key excited states for $\text{Cp}^*\text{Ti}(\text{C}_2\text{Fc})_2$                                                     | S10         |
| <b>Table S7.</b> TDDFT output for key excited states for $\text{Me}^{\text{OOC}}\text{Cp}_2\text{Ti}(\text{C}_2\text{Fc})_2$                                   | S11         |
| <b>Table S8.</b> Orbitals involved in key excited states for $\text{Me}^{\text{OOC}}\text{Cp}_2\text{Ti}(\text{C}_2\text{Fc})_2$                               | S12         |
| <b>Table S9.</b> TDDFT output for key excited states for $\text{Cp}_2\text{Ti}(\text{C}_2\text{Fc})_2\text{CuI}$                                               | S13         |
| <b>Table S10.</b> Orbitals involved in key excited states for $\text{Cp}_2\text{Ti}(\text{C}_2\text{Fc})_2\text{CuI}$                                          | S14         |

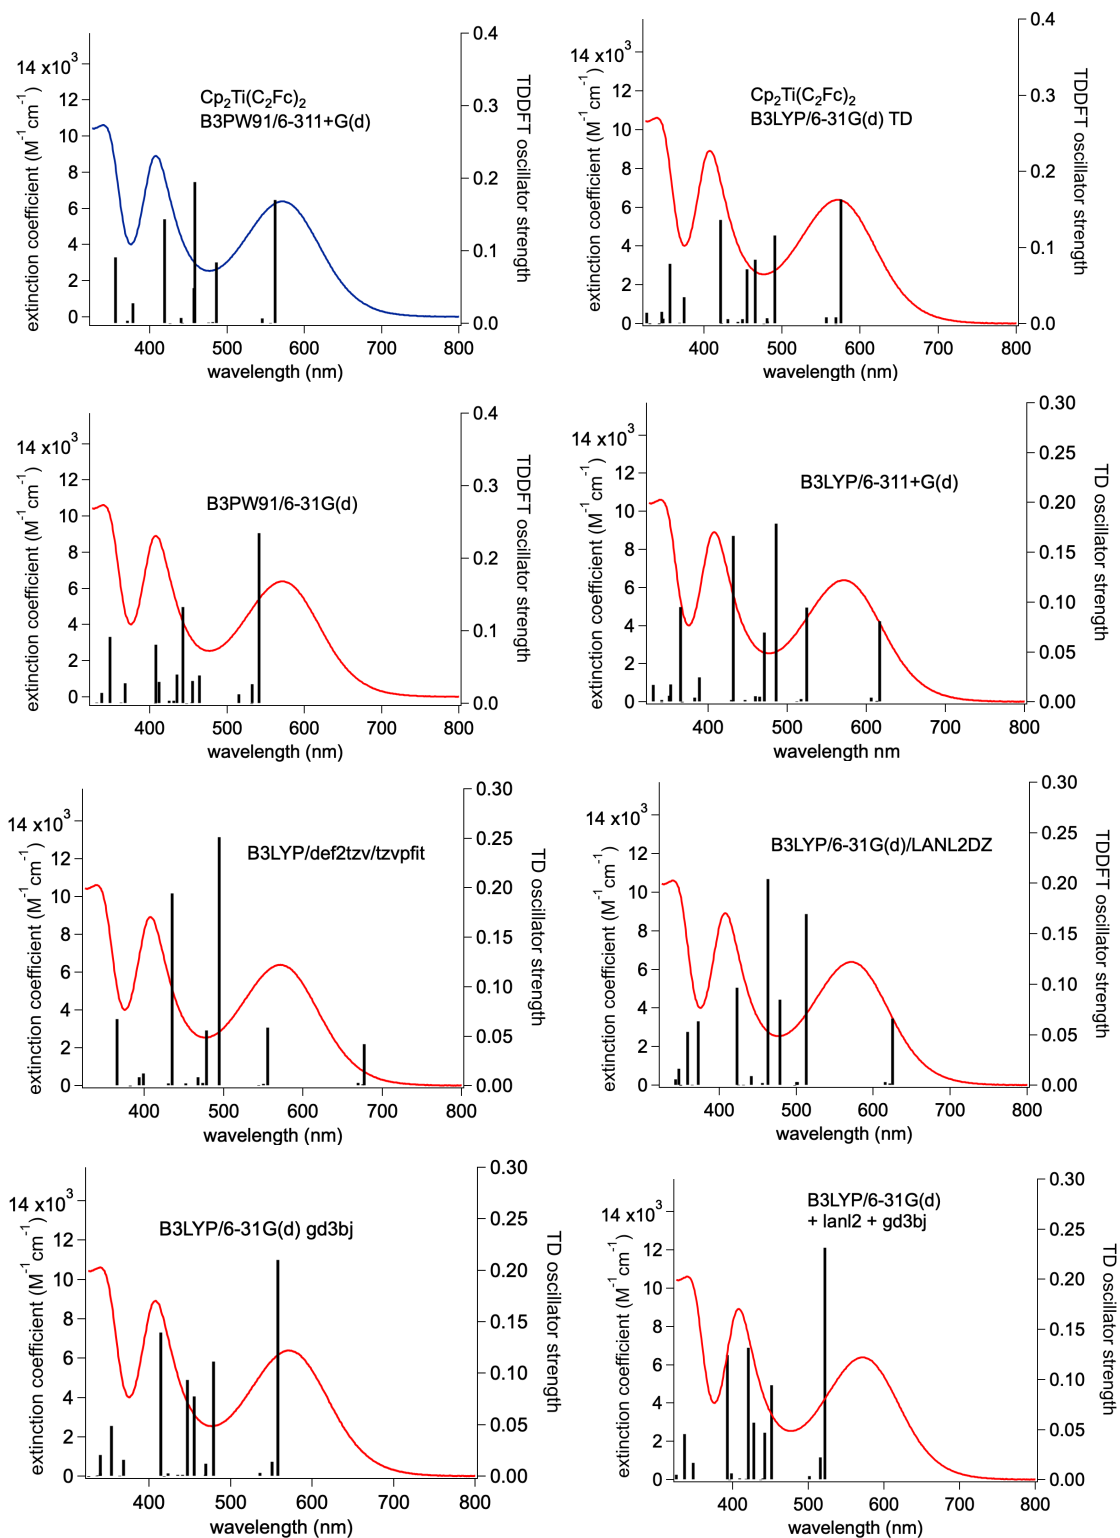

**Figure S1.** Overlay of experimental spectra and TDDFT predicted vertical transitions and oscillator strengths for various computational models. All computational models utilize solvent=thf. Optimization and TDDFT were performed within the same computational model.

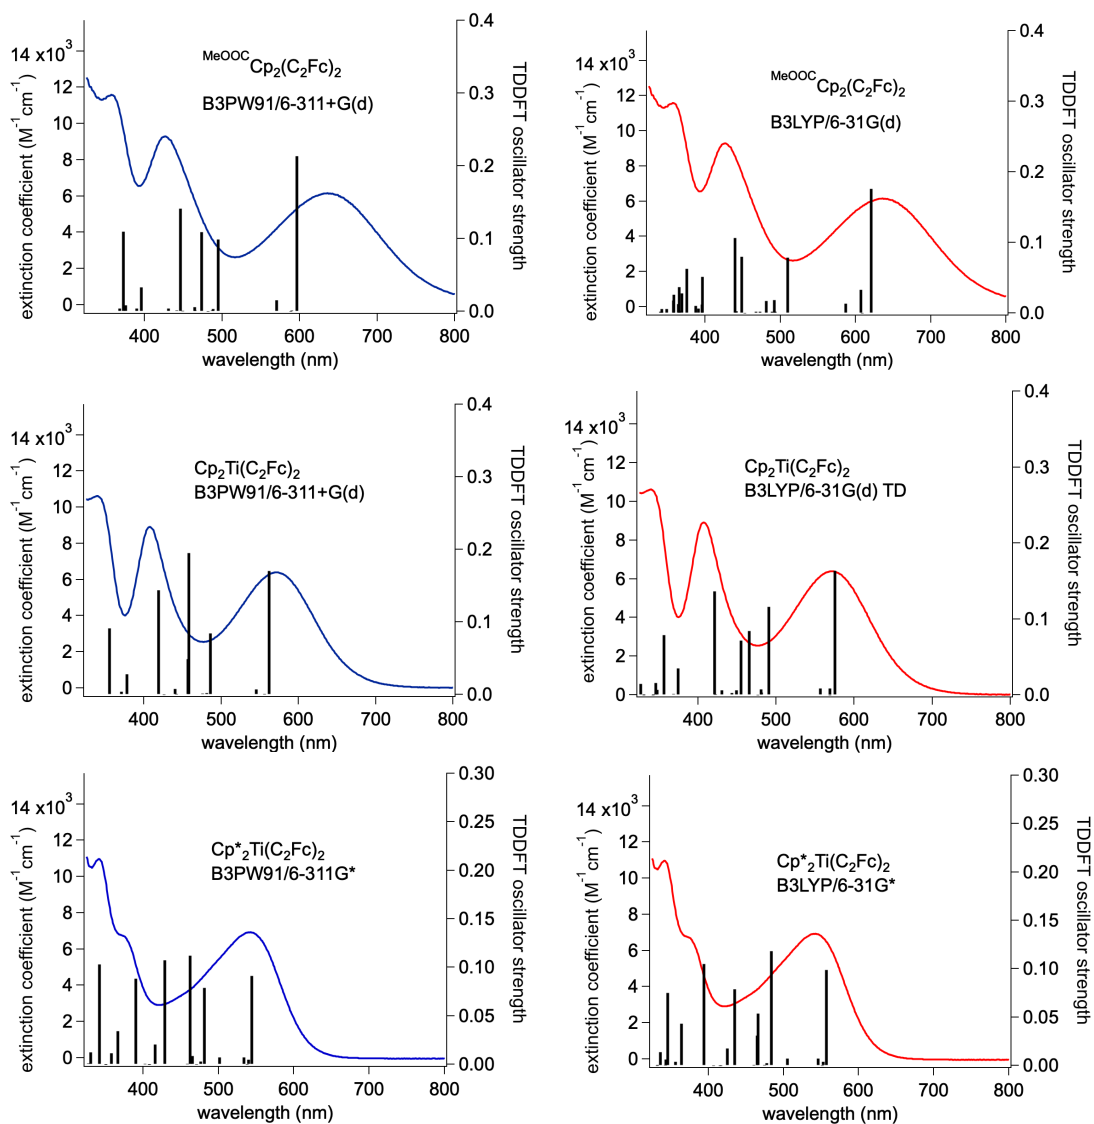

**Figure S2.** Overlay of experimental spectra and TDDFT predicted vertical transitions and oscillator strengths (B3PW91/6-311+G(d) (left) vs B3LYP/6-31G(d) (right)) for  $\text{MeOOC-Cp}_2\text{Ti}(\text{C}_2\text{Fc})_2$  (top),  $\text{Cp}_2\text{Ti}(\text{C}_2\text{Fc})_2$  (middle), and  $\text{Cp}^*_2\text{Ti}(\text{C}_2\text{Fc})_2$  (bottom). Comparison of. The experimental spectra were recorded in THF. Optimization and TDDFT employed a THF solvent model.

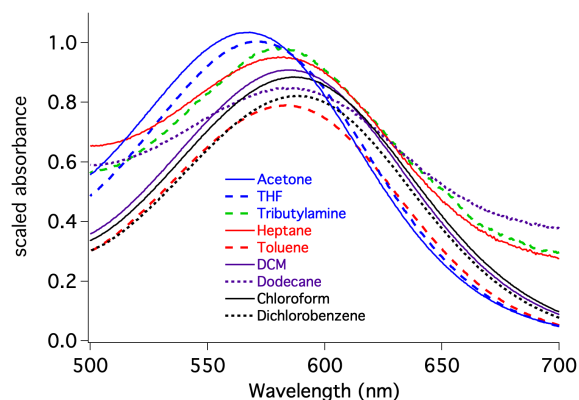

**Figure S3.** Solvatochromic data for remaining solvents not shown in manuscript Figure 5 for  $\text{Cp}_2\text{Ti}(\text{C}_2\text{Fc})_2$ . Absorbance is scaled to allow observation of all peaks.

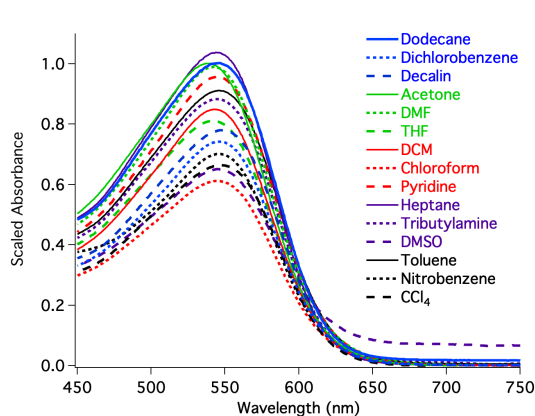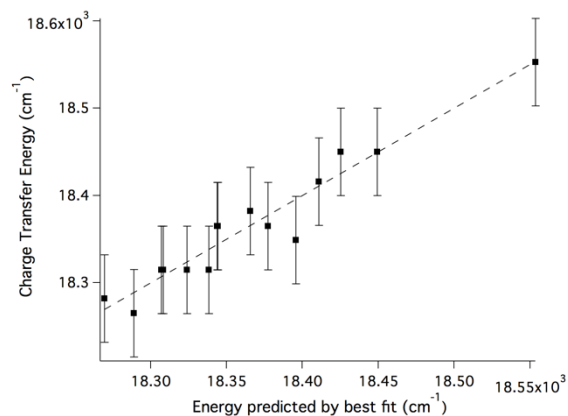

**Figure S4.** Solvatochromic data (left) for  $\text{Cp}^*\text{Ti}(\text{C}_2\text{Fc})_2$  along with a representation of the goodness of fit to equation 1 (right). Absorbance is scaled to allow observation of all peaks. Wavelengths recorded in manuscript Table 1.

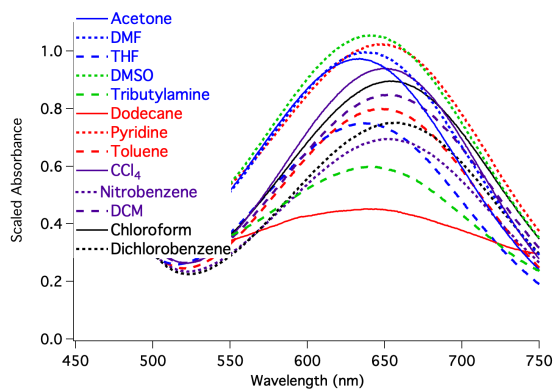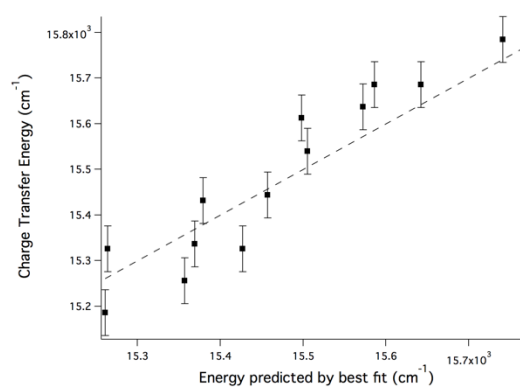

**Figure S5.** Solvatochromic data (left) for  $\text{MeOOC-Cp}_2\text{Ti}(\text{C}_2\text{Fc})_2$  along with a representation of the goodness of fit to equation 1 (right). Absorbance is scaled to allow observation of all peaks. Wavelengths recorded in manuscript Table 1.

**Table S1.** TDDFT output for key excited states for Cp<sub>2</sub>Ti(C<sub>2</sub>Fc)<sub>2</sub>

|                     |                |           |           |          |              |
|---------------------|----------------|-----------|-----------|----------|--------------|
| Excited State 1:    | Singlet-A      | 2.1531 eV | 575.83 nm | f=0.1641 | <S**2>=0.000 |
| 149 ->160           | 0.11398        |           |           |          |              |
| 150 ->161           | -0.15130       |           |           |          |              |
| 151 ->154           | -0.10597       |           |           |          |              |
| 151 ->162           | -0.15164       |           |           |          |              |
| 152 ->157           | 0.15329        |           |           |          |              |
| 152 ->159           | -0.21372       |           |           |          |              |
| <b>153 -&gt;154</b> | <b>0.52541</b> |           |           |          |              |
| 153 ->160           | 0.22823        |           |           |          |              |
| Excited State 5:    | Singlet-A      | 2.5271 eV | 490.61 nm | f=0.1154 | <S**2>=0.000 |
| 145 ->154           | 0.11302        |           |           |          |              |
| 145 ->160           | 0.14732        |           |           |          |              |
| 146 ->159           | -0.11019       |           |           |          |              |
| 148 ->154           | -0.14690       |           |           |          |              |
| 149 ->154           | -0.20214       |           |           |          |              |
| <b>150 -&gt;161</b> | <b>0.32404</b> |           |           |          |              |
| 151 ->154           | -0.10063       |           |           |          |              |
| <b>151 -&gt;162</b> | <b>0.31696</b> |           |           |          |              |
| 152 ->159           | 0.11317        |           |           |          |              |
| <b>153 -&gt;154</b> | <b>0.30064</b> |           |           |          |              |
| 153 ->160           | -0.11676       |           |           |          |              |
| Excited State 15:   | Singlet-A      | 2.9409 eV | 421.58 nm | f=0.1393 | <S**2>=0.000 |
| 148 ->154           | -0.31042       |           |           |          |              |
| <b>149 -&gt;154</b> | <b>0.56369</b> |           |           |          |              |
| 150 ->161           | 0.10714        |           |           |          |              |
| 151 ->162           | 0.12056        |           |           |          |              |
| Excited State 18:   | Singlet-A      | 3.4794 eV | 356.34 nm | f=0.0807 | <S**2>=0.000 |
| <b>144 -&gt;154</b> | <b>0.62626</b> |           |           |          |              |
| 147 ->154           | 0.13737        |           |           |          |              |
| 152 ->160           | 0.10680        |           |           |          |              |
| 153 ->159           | -0.10839       |           |           |          |              |

**Table S2.** Orbitals involved in key excited states for  $\text{Cp}_2\text{Ti}(\text{C}_2\text{Fc})_2$

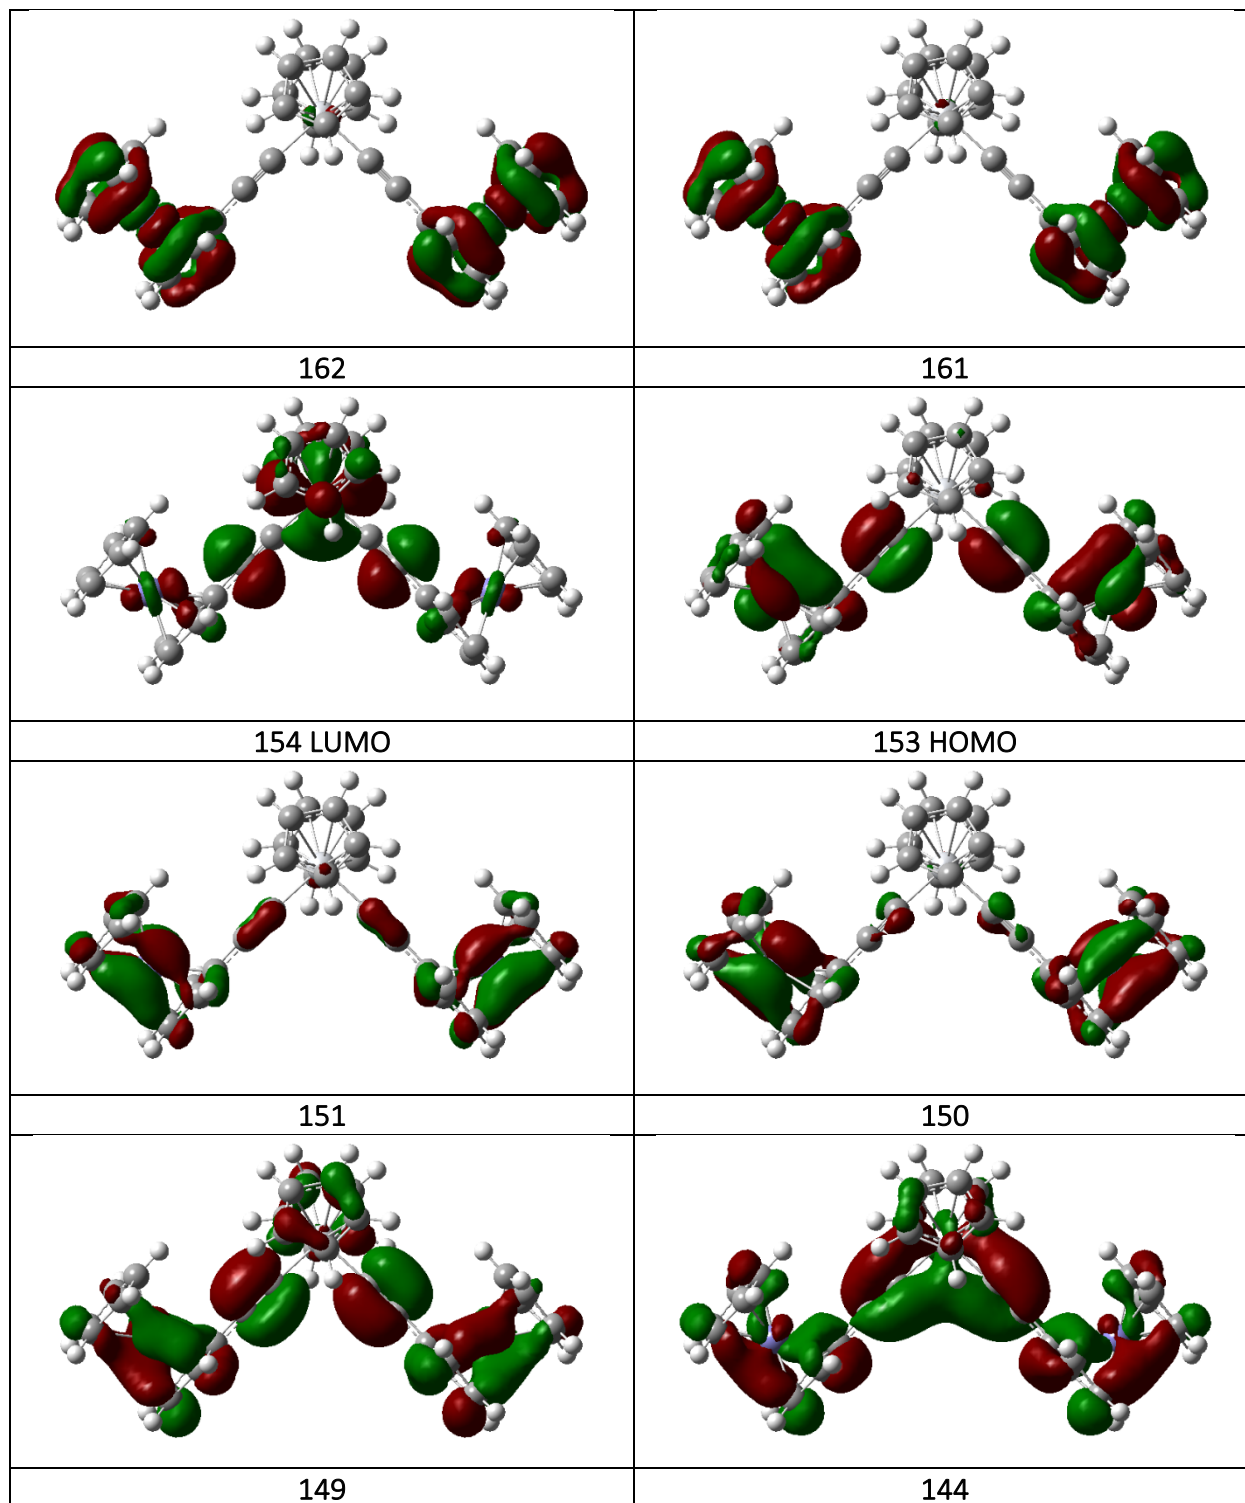

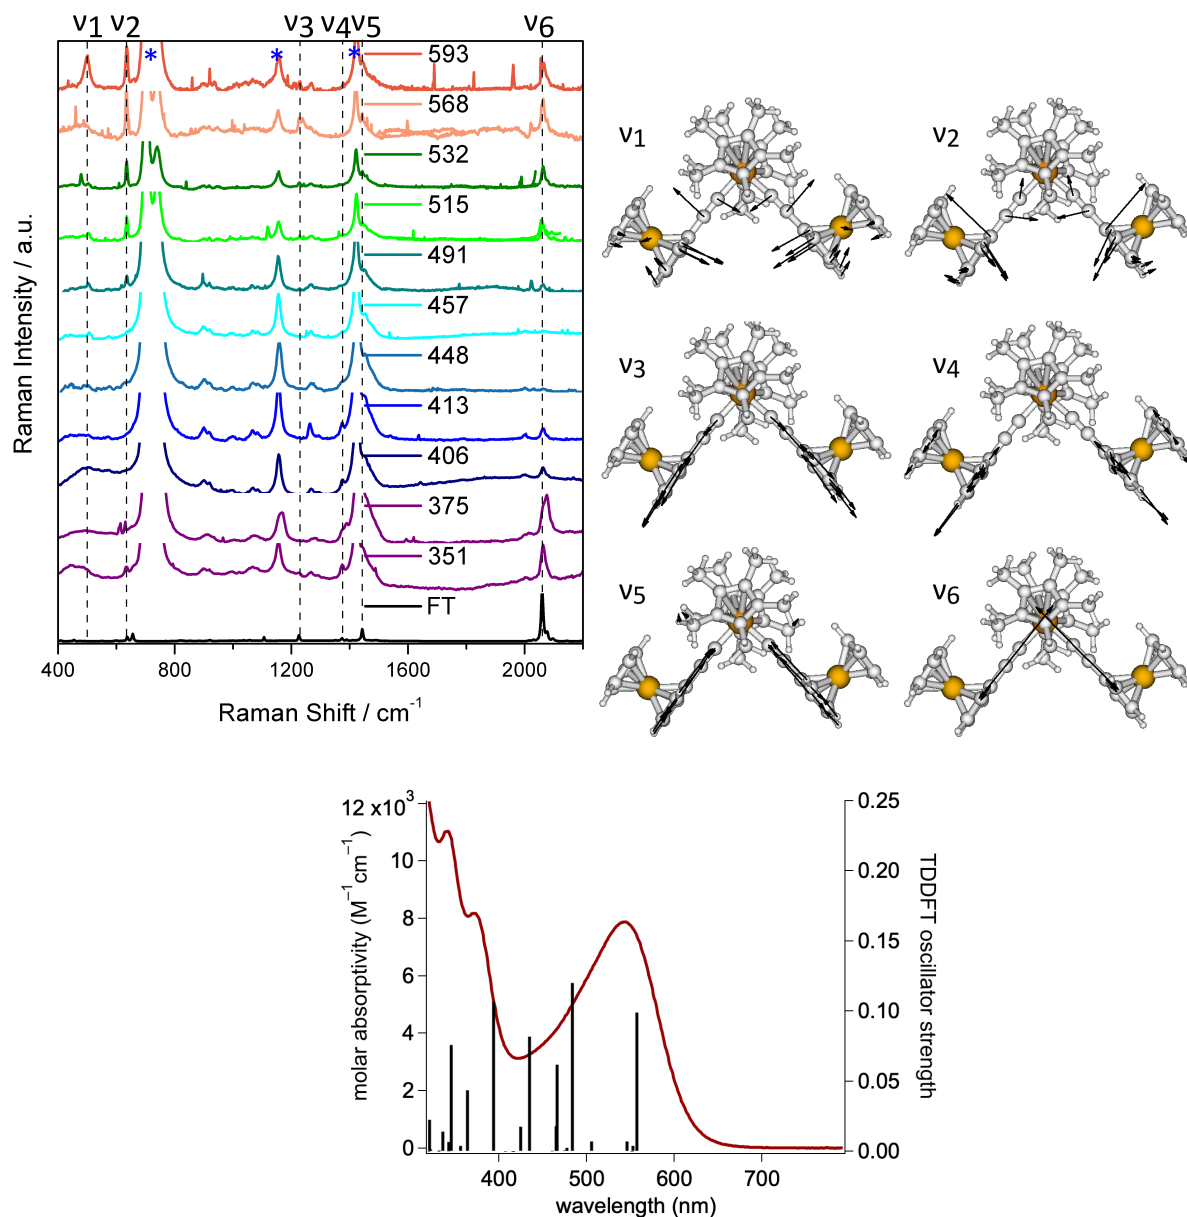

**Figure S6.** Top Left: Resonance Raman spectra for  $\text{Cp}^*\text{Ti}(\text{C}_2\text{Fc})_2$  in  $\text{CH}_2\text{Cl}_2$ , at the wavelengths listed (solvent bands are marked with \*). Top Right: Key vibrational modes. Bottom: Overlay of experimental UV-Vis in  $\text{CH}_2\text{Cl}_2$  with TDDFT predicted vertical transitions. Vibrational modes and TDDFT vertical transitions modelled in  $\text{CH}_2\text{Cl}_2$  using B3LYP/6-31G(d).

**Table S3.** Key electronic transitions of  $\text{Cp}^*\text{Ti}(\text{C}_2\text{Fc})_2$  with associated changes in electron density.<sup>a</sup>

| $\lambda$ (nm) | Oscillator Strength | Ti        | $\text{Cp}^*\text{Ti}$ | Fe          | $\text{C}_2\text{CpFe}$ | $\text{CpFe}$ |
|----------------|---------------------|-----------|------------------------|-------------|-------------------------|---------------|
| 557            | 0.099               | 1→33 (32) | 6→8 (2)                | 58→29 (-29) | 27→22 (-5)              | 8→9 (1)       |
| 483            | 0.120               | 2→27 (25) | 11→6 (-5)              | 60→36 (-24) | 20→21 (1)               | 7→10 (3)      |
| 435            | 0.082               | 5→52 (47) | 24→9 (-15)             | 39→12 (-27) | 28→24 (-4)              | 5→3 (-2)      |
| 393            | 0.107               | 8→54 (46) | 40→10 (-30)            | 18→9 (-9)   | 29→24 (-5)              | 4→3 (-1)      |
| 345            | 0.076               | 5→54 (49) | 11→10 (-1)             | 33→9 (-24)  | 43→24 (-19)             | 8→3 (-5)      |

<sup>a</sup> Calculated from a Mulliken population analysis from the TDDFT data calculated at the B3LYP/6-31G(d) level using solvent =  $\text{CH}_2\text{Cl}_2$ .

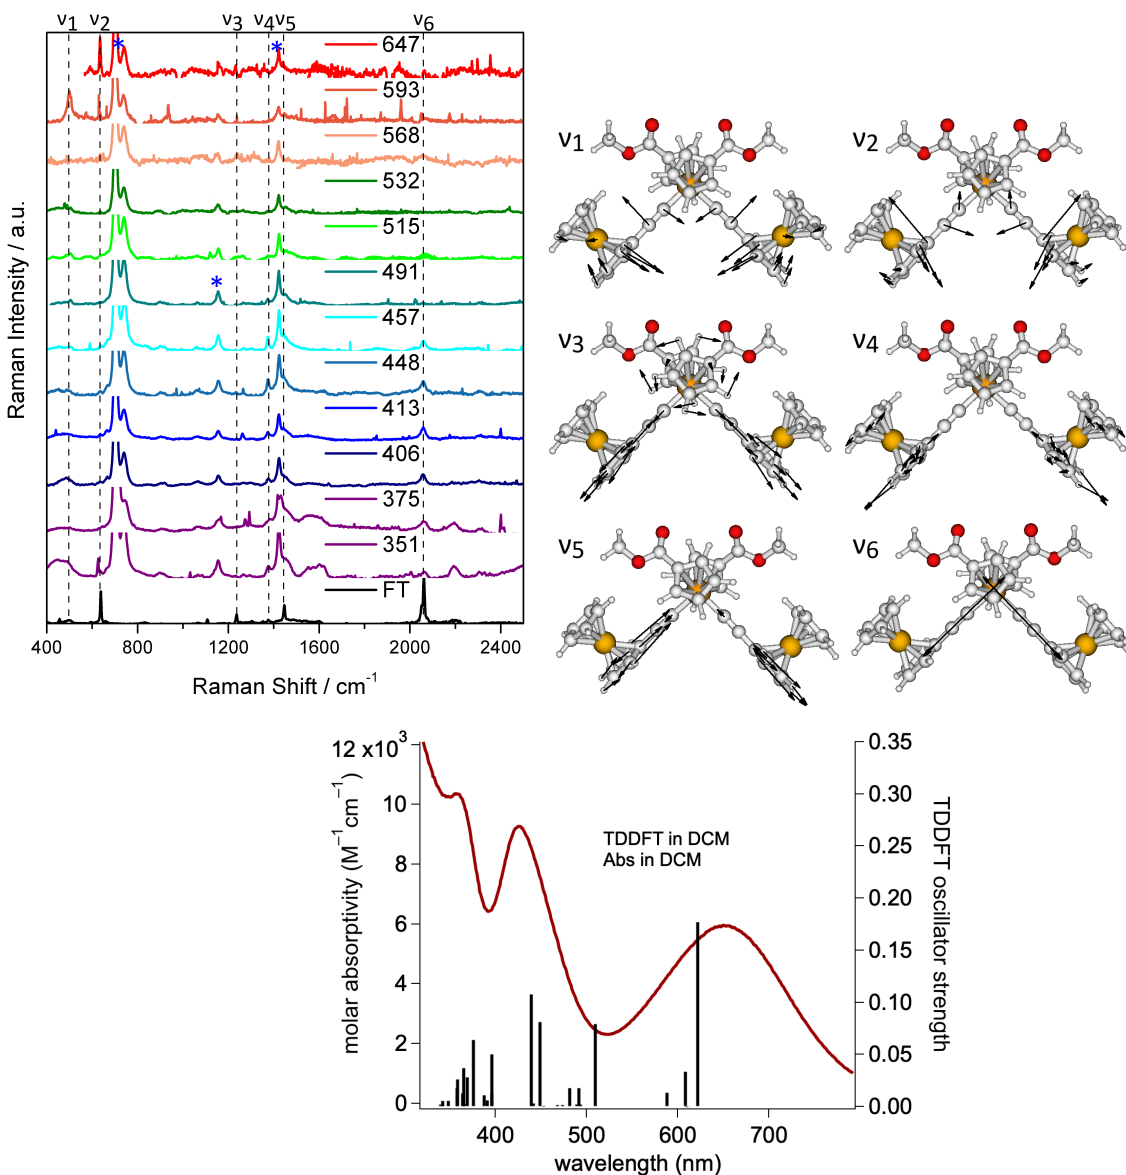

**Figure S7.** Top Left: Resonance Raman spectra for  $\text{MeOOC-Cp}_2\text{Ti}(\text{C}_2\text{Fc})_2$  in  $\text{CH}_2\text{Cl}_2$ , at the wavelengths listed (solvent bands are marked with \*). Top Right: Key vibrational modes. Bottom: Overlay of experimental UV-Vis in  $\text{CH}_2\text{Cl}_2$  with TDDFT predicted vertical transitions. Vibrational modes and TDDFT vertical transitions modelled in  $\text{CH}_2\text{Cl}_2$  using B3LYP/6-31G(d).

**Table S4.** Key electronic transitions of  $\text{MeOOC-Cp}_2\text{Ti}(\text{C}_2\text{Fc})_2$  with associated changes in electron density.<sup>a</sup>

| $\lambda$ (nm) | Oscillator Strength | Ti        | $\text{MeOOC-Cp}_{\text{Ti}}$ | Fe          | $\text{C}_2\text{Cp}_{\text{Fe}}$ | $\text{Cp}_{\text{Fe}}$ |
|----------------|---------------------|-----------|-------------------------------|-------------|-----------------------------------|-------------------------|
| 622            | 0.177               | 0→53 (53) | 2→13 (11)                     | 66→9 (-57)  | 23→23 (0)                         | 9→2 (-7)                |
| 510            | 0.079               | 1→32 (31) | 5→11 (6)                      | 55→28 (-27) | 31→21 (-10)                       | 8→8 (0)                 |
| 439            | 0.108               | 2→45 (43) | 16→11 (-5)                    | 42→16 (-26) | 36→22 (-14)                       | 4→5 (1)                 |
| 376            | 0.063               | 5→56 (51) | 12→17 (5)                     | 18→5 (-13)  | 55→22 (-33)                       | 9→1 (-8)                |

<sup>a</sup> Calculated from a Mulliken population analysis from the TDDFT data calculated at the B3LYP/6-31G(d) level using solvent =  $\text{CH}_2\text{Cl}_2$ .



**Table S5.** TDDFT output for key excited states for Cp\*<sub>2</sub>Ti(C<sub>2</sub>Fc)<sub>2</sub>

|                     |                 |           |           |          |              |
|---------------------|-----------------|-----------|-----------|----------|--------------|
| Excited State 1:    | Singlet-B       | 2.2242 eV | 557.43 nm | f=0.0991 | <S**2>=0.000 |
| 188 ->199           | 0.14367         |           |           |          |              |
| 190 ->197           | 0.10008         |           |           |          |              |
| 190 ->201           | 0.18408         |           |           |          |              |
| 191 ->197           | -0.21223        |           |           |          |              |
| 191 ->200           | 0.19439         |           |           |          |              |
| 192 ->202           | 0.18314         |           |           |          |              |
| <b>193 -&gt;194</b> | <b>0.43787</b>  |           |           |          |              |
| 193 ->199           | 0.25319         |           |           |          |              |
| Excited State 6:    | Singlet-B       | 2.5629 eV | 483.77 nm | f=0.1201 | <S**2>=0.000 |
| 183 ->194           | -0.14183        |           |           |          |              |
| 183 ->199           | -0.19244        |           |           |          |              |
| 184 ->197           | 0.13123         |           |           |          |              |
| 184 ->200           | -0.12561        |           |           |          |              |
| 188 ->194           | -0.22344        |           |           |          |              |
| 189 ->202           | 0.13482         |           |           |          |              |
| 190 ->201           | -0.23857        |           |           |          |              |
| 191 ->201           | -0.19030        |           |           |          |              |
| <b>192 -&gt;202</b> | <b>-0.28147</b> |           |           |          |              |
| <b>193 -&gt;194</b> | <b>0.34073</b>  |           |           |          |              |
| Excited State 12:   | Singlet-B       | 2.8500 eV | 435.03 nm | f=0.0819 | <S**2>=0.000 |
| 183 ->194           | -0.17627        |           |           |          |              |
| 183 ->199           | -0.14851        |           |           |          |              |
| <b>186 -&gt;194</b> | <b>0.35299</b>  |           |           |          |              |
| 188 ->194           | -0.29949        |           |           |          |              |
| <b>193 -&gt;194</b> | <b>-0.34280</b> |           |           |          |              |
| 193 ->199           | 0.16542         |           |           |          |              |
| Excited State 17:   | Singlet-B       | 3.1487 eV | 393.76 nm | f=0.1069 | <S**2>=0.000 |
| <b>186 -&gt;194</b> | <b>0.52378</b>  |           |           |          |              |
| <b>188 -&gt;194</b> | <b>0.39168</b>  |           |           |          |              |
| 190 ->201           | -0.10880        |           |           |          |              |
| 192 ->202           | -0.12284        |           |           |          |              |
| Excited State 20:   | Singlet-A       | 3.5858 eV | 345.77 nm | f=0.0758 | <S**2>=0.000 |
| 181 ->194           | -0.14808        |           |           |          |              |
| <b>182 -&gt;194</b> | <b>0.54852</b>  |           |           |          |              |
| 184 ->194           | -0.13901        |           |           |          |              |
| 185 ->194           | -0.14871        |           |           |          |              |
| 190 ->199           | -0.10657        |           |           |          |              |
| 192 ->201           | -0.10050        |           |           |          |              |
| 193 ->197           | -0.11328        |           |           |          |              |

**Table S6.** Orbitals involved in key excited states for  $\text{Cp}^*_2\text{Ti}(\text{C}_2\text{Fc})_2$

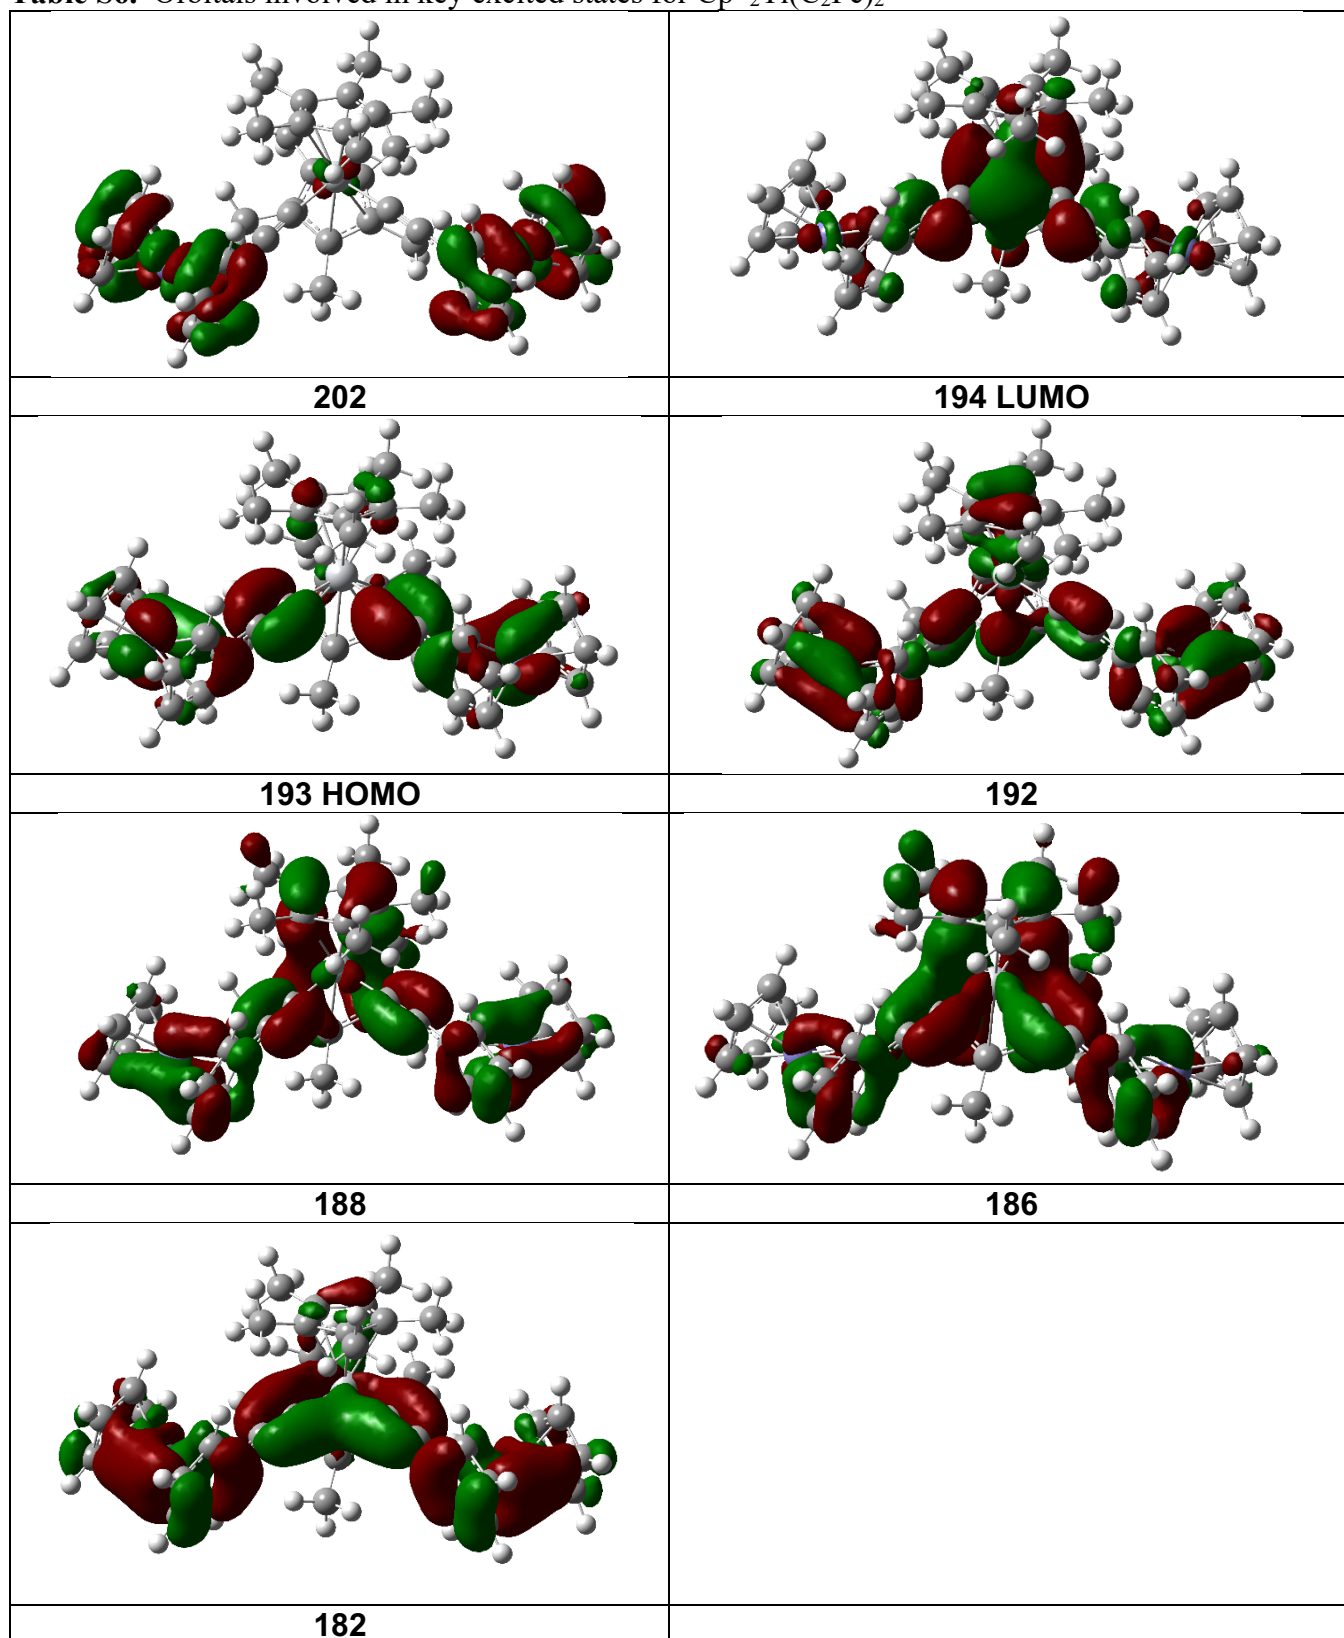

**Table S7.** TDDFT output for key excited states for  $\text{MeOOCp}_2\text{Ti}(\text{C}_2\text{Fc})_2$

Excited State 1: Singlet-B 1.9940 eV 621.80 nm f=0.1767 <S\*\*2>=0.000  
181 ->184 0.20862  
182 ->189 0.12784  
182 ->192 -0.14716  
**183 ->184 0.59217**  
183 ->191 0.12769

Excited State 5: Singlet-B 2.4317 eV 509.87 nm f=0.0792 <S\*\*2>=0.000  
176 ->184 -0.12795  
177 ->184 0.17243  
**179 ->184 0.36707**  
180 ->193 -0.25942  
181 ->191 0.10204  
181 ->194 -0.24097  
182 ->189 0.14558  
182 ->192 -0.18574  
183 ->184 -0.20219  
183 ->190 -0.10263  
183 ->191 0.16791  
183 ->194 0.10034

Excited State 15: Singlet-B 2.8211 eV 439.48 nm f=0.1081 <S\*\*2>=0.000  
175 ->193 -0.11076  
176 ->184 -0.24695  
176 ->194 -0.13414  
**177 ->184 0.41789**  
177 ->194 -0.10709  
178 ->193 -0.13685  
179 ->184 -0.30583  
180 ->192 0.10488  
180 ->193 -0.10354  
181 ->184 0.14646  
181 ->191 -0.12814

Excited State 20: Singlet-A 3.2990 eV 375.83 nm f=0.0629 <S\*\*2>=0.000  
**174 ->184 0.54697**  
175 ->184 0.30066  
182 ->185 0.20372

**Table S8.** Orbitals involved in key excited states for  $\text{Me}^{\text{OOC}}\text{Cp}_2\text{Ti}(\text{C}_2\text{Fc})_2$

|                                                                                    |                                                                                    |
|------------------------------------------------------------------------------------|------------------------------------------------------------------------------------|
| 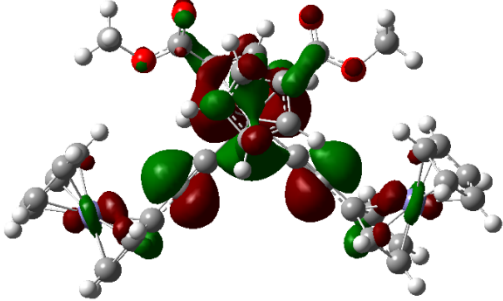  |  |
| 184 LUMO                                                                           | 183 HOMO                                                                           |
|   |  |
| 179                                                                                | 177                                                                                |
|  |                                                                                    |
| 174                                                                                |                                                                                    |

**Table S9.** TDDFT output for key excited states for Cp<sub>2</sub>Ti(C<sub>2</sub>Fc)<sub>2</sub>CuI

|                     |                |           |           |          |              |
|---------------------|----------------|-----------|-----------|----------|--------------|
| Excited State 1:    | Singlet-A      | 2.1136 eV | 586.60 nm | f=0.1266 | <S**2>=0.000 |
| 168 ->175           | -0.10974       |           |           |          |              |
| 168 ->178           | 0.19668        |           |           |          |              |
| 169 ->180           | 0.12006        |           |           |          |              |
| 170 ->179           | -0.12088       |           |           |          |              |
| <b>171 -&gt;172</b> | <b>0.58028</b> |           |           |          |              |
| 171 ->177           | 0.20527        |           |           |          |              |
| Excited State 5:    | Singlet-A      | 2.4592 eV | 504.16 nm | f=0.0514 | <S**2>=0.000 |
| <b>167 -&gt;172</b> | <b>0.35043</b> |           |           |          |              |
| 168 ->178           | 0.16426        |           |           |          |              |
| 169 ->179           | -0.10802       |           |           |          |              |
| 169 ->180           | 0.28360        |           |           |          |              |
| 170 ->179           | -0.28454       |           |           |          |              |
| 170 ->180           | -0.11127       |           |           |          |              |
| 171 ->172           | -0.23988       |           |           |          |              |
| 171 ->177           | 0.17710        |           |           |          |              |
| Excited State 17:   | Singlet-A      | 3.0628 eV | 404.81 nm | f=0.1563 | <S**2>=0.000 |
| 162 ->172           | 0.16985        |           |           |          |              |
| 164 ->172           | -0.10581       |           |           |          |              |
| <b>165 -&gt;172</b> | <b>0.64539</b> |           |           |          |              |
| Excited State 21:   | Singlet-A      | 3.3528 eV | 369.79 nm | f=0.2367 | <S**2>=0.000 |
| <b>161 -&gt;172</b> | <b>0.66693</b> |           |           |          |              |
| 163 ->172           | 0.10231        |           |           |          |              |

**Table S10.** Orbitals involved in key excited states for  $\text{Cp}_2\text{Ti}(\text{C}_2\text{Fc})_2\text{CuI}$

|                                                                                     |                                                                                    |
|-------------------------------------------------------------------------------------|------------------------------------------------------------------------------------|
| 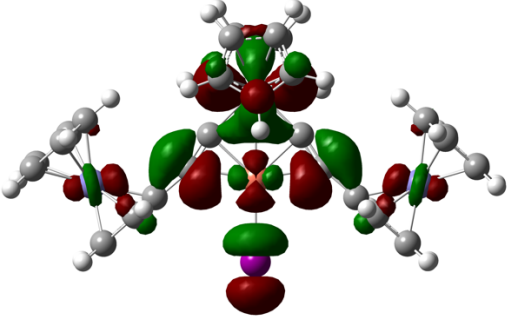   |  |
| 172 LUMO                                                                            | 171 HOMO                                                                           |
|    |  |
| 167                                                                                 | 165                                                                                |
|  |                                                                                    |
| 161                                                                                 |                                                                                    |
